# Supplementary material for: SeqClone: sequential Monte Carlo based inference of tumor subclones
Source: Springer Nature journal article supplement (doi:10.1186/s12859-018-2562-y), 2019-01-05
Supplement: 12859_2018_2562_MOESM1_ESM.pdf [file 12859_2018_2562_MOESM1_ESM.pdf]

# Supplementary Material for “SeqClone: Sequential Monte Carlo Based Inference of Tumor Subclones”

Oyetunji Ogundijo<sup>1</sup> and Xiaodong Wang<sup>1,\*</sup>

## Section A

Here, we present how the point estimates of the unknown variables in our model are obtained from the posterior weighted Monte Carlo samples from SeqClone, following the procedures highlighted in [1].

First, we factorize the joint posterior distribution of all the unknown variables given the input dataset (matrices  $\mathbf{Y}$  and  $\mathbf{V}$ ) as follows:

$$p(C, \mathbf{Z}, \mathbf{W}, p|\mathbf{Y}, \mathbf{V}) = p(C|\mathbf{Y}, \mathbf{V})p(\mathbf{Z}|\mathbf{Y}, \mathbf{V}, C)p(\mathbf{W}, p|\mathbf{Y}, \mathbf{V}, C, \mathbf{Z}).$$

Then, based on the available posterior Monte Carlo samples for  $\mathbf{Z}$ , we approximately evaluate the marginal posterior distribution for  $C$  and then determine the maximum a posteriori (MAP) estimate  $\hat{C}$ .

Next, conditional on  $\hat{C}$ , we then estimate  $\mathbf{Z}$  as follows. For any two matrices  $\mathbf{Z}$  and  $\mathbf{Z}'$ ,  $1 \leq c, c' \leq \hat{C}$ , define

$$\mathcal{D}_{cc'}(\mathbf{Z}, \mathbf{Z}') = \sum_{t=1}^T |z_{tc} - z'_{tc'}|,$$

and define a distance

$$d(\mathbf{Z}, \mathbf{Z}') = \min_{c=1}^{\hat{C}} \sum_{c=1}^{\hat{C}} \mathcal{D}_{c, \pi_c}(\mathbf{Z}, \mathbf{Z}'),$$

where  $\pi_c$  is a permutation of  $\{1, \dots, \hat{C}\}$  and the minimum is over all possible permutations. Thus, an estimate for  $\mathbf{Z}$  is defined as:

$$\begin{aligned} \hat{\mathbf{Z}} &= \operatorname{argmin}_{\mathbf{Z}'} \int d(\mathbf{Z}, \mathbf{Z}') dp(\mathbf{Z}|\mathbf{Y}, \hat{C}) \\ &\approx \operatorname{argmin}_{\mathbf{Z}'} \sum_{i=1}^N w_T^i d(\mathbf{Z}_T^i, \mathbf{Z}') \end{aligned}$$

---

\*to whom correspondence should be addressed

Table 1: CLL077: Genotypes of Subclones.

|    | Gene    | Clomial |    |    |    | BayClone |    |    |    | Cloe |    |    |    |
|----|---------|---------|----|----|----|----------|----|----|----|------|----|----|----|
|    |         | C1      | C2 | C3 | C4 | C1       | C2 | C3 | C4 | C1   | C2 | C3 | C4 |
| 1  | BCL2L13 | 1       | 0  | 1  | 1  | 1        | 1  | 1  | 1  | 1    | 1  | 1  | 1  |
| 2  | COL24A1 | 0       | 1  | 0  | 0  | 0        | 1  | 0  | 0  | 0    | 1  | 0  | 0  |
| 3  | DAZAP1  | 0       | 0  | 1  | 1  | 0        | 0  | 1  | 1  | 0    | 0  | 1  | 1  |
| 4  | EXOC6B  | 0       | 0  | 1  | 1  | 0        | 0  | 1  | 1  | 0    | 0  | 1  | 1  |
| 5  | GHDC    | 0       | 0  | 1  | 1  | 0        | 0  | 1  | 1  | 0    | 0  | 1  | 1  |
| 6  | GPR158  | 1       | 0  | 1  | 1  | 1        | 1  | 1  | 1  | 1    | 1  | 1  | 1  |
| 7  | HMCN1   | 0       | 1  | 0  | 0  | 0        | 1  | 0  | 0  | 0    | 1  | 0  | 0  |
| 8  | KLHDC2  | 0       | 1  | 0  | 0  | 0        | 1  | 0  | 0  | 0    | 1  | 0  | 0  |
| 9  | LRRC16A | 0       | 0  | 0  | 1  | 0        | 0  | 0  | 1  | 0    | 0  | 0  | 1  |
| 10 | MAP2K1  | 0       | 1  | 0  | 0  | 0        | 1  | 0  | 0  | 0    | 1  | 0  | 0  |
| 11 | NAMPTL  | 1       | 0  | 1  | 1  | 1        | 1  | 1  | 1  | 1    | 1  | 1  | 1  |
| 12 | NOD1    | 0       | 1  | 0  | 0  | 0        | 1  | 0  | 0  | 0    | 1  | 0  | 0  |
| 13 | OCA2    | 0       | 0  | 1  | 1  | 0        | 0  | 1  | 1  | 0    | 0  | 1  | 1  |
| 14 | PLA2G16 | 0       | 0  | 1  | 1  | 0        | 0  | 1  | 1  | 0    | 0  | 1  | 1  |
| 15 | SAMHD1  | 1       | 1  | 1  | 1  | 1        | 1  | 1  | 1  | 1    | 1  | 1  | 1  |
| 16 | SLC12A1 | 1       | 0  | 1  | 1  | 1        | 1  | 1  | 1  | 1    | 1  | 1  | 1  |

for posterior Monte Carlo samples,  $\{\mathbf{Z}_T^i\}_{i=1}^N$  and the normalized weights  $\{w_i\}_{i=1}^N$ .

Finally, we report posterior estimates  $\hat{\mathbf{W}}$  and  $\hat{p}$  for  $\mathbf{W}$  and  $p$ , respectively conditional on  $\hat{C}$  and  $\hat{\mathbf{Z}}$ .

## Section B

In our experiments, for SeqClone, we set  $N = 500$  for the CLL datasets,  $N = 1000$  for the simulated datasets,  $a_0 = 0.2$ ,  $a = 3$ ,  $a_{00} = 1$ , and  $b_{00} = 100$ .  $\alpha$  was set to 0.02 and 0.05 for the simulated and the CLL datasets, respectively. For Bayclone and Cloe, we ran 30,000 iterations, discarding the first 15,000 as burn-in, and thinning the chain by taking every 30<sup>th</sup> sample. For Clomial, we used 2000 iterations for all experiments.

Moreover, in Tables 1 - 6, we provide the results obtained on each of the CLL datasets when analyzed with Clomial, BayClone and Cloe, the three algorithms compared with SeqClone in the main paper. In the genotype matrices, each column denotes a subclone, and a 0 and a 1 denote the presence and absence of a mutation in a subclone, respectively. Also, the subclonal proportion matrices show the proportions of each subclone in each of the samples. For BayClone, we report a 1 in the genotype matrix for any output that is greater or equal to 0.5.

Table 2: CLL077: Proportions of Subclones.

|          |    | TP a | TP b | TP c | TP d | TP e |
|----------|----|------|------|------|------|------|
| Clomial  | C0 | 0.00 | 0.00 | 0.00 | 0.00 | 0.00 |
|          | C1 | 0.27 | 0.18 | 0.16 | 0.23 | 0.43 |
|          | C2 | 0.01 | 0.03 | 0.04 | 0.12 | 0.34 |
|          | C3 | 0.39 | 0.27 | 0.30 | 0.26 | 0.13 |
|          | C4 | 0.33 | 0.52 | 0.50 | 0.39 | 0.10 |
| BayClone | C0 | 0.06 | 0.04 | 0.00 | 0.04 | 0.37 |
|          | C1 | 0.21 | 0.14 | 0.15 | 0.14 | 0.07 |
|          | C2 | 0.00 | 0.03 | 0.05 | 0.16 | 0.33 |
|          | C3 | 0.40 | 0.25 | 0.31 | 0.28 | 0.13 |
|          | C4 | 0.33 | 0.54 | 0.49 | 0.38 | 0.10 |
| Cloe     | C0 | 0.05 | 0.04 | 0.00 | 0.03 | 0.39 |
|          | C1 | 0.16 | 0.15 | 0.17 | 0.15 | 0.03 |
|          | C2 | 0.02 | 0.02 | 0.02 | 0.14 | 0.34 |
|          | C3 | 0.42 | 0.21 | 0.34 | 0.31 | 0.14 |
|          | C4 | 0.35 | 0.58 | 0.47 | 0.37 | 0.10 |

Table 3: CLL006: Genotypes of Subclones.

|    | Gene      | Clomial |    |    |    | BayClone |    |    |    |    | Cloe |    |    |    |    |    |
|----|-----------|---------|----|----|----|----------|----|----|----|----|------|----|----|----|----|----|
|    |           | C1      | C2 | C3 | C4 | C1       | C2 | C3 | C4 | C5 | C1   | C2 | C3 | C4 | C5 | C6 |
| 1  | ARHGAP29  | 1       | 1  | 1  | 1  | 1        | 1  | 1  | 1  | 1  | 1    | 1  | 1  | 1  | 1  | 1  |
| 2  | EGFR      | 1       | 1  | 1  | 1  | 1        | 1  | 1  | 1  | 1  | 1    | 1  | 1  | 1  | 1  | 0  |
| 3  | IRF4      | 0       | 0  | 0  | 1  | 1        | 0  | 0  | 0  | 1  | 1    | 0  | 0  | 0  | 1  | 0  |
| 4  | KIAA0182  | 1       | 1  | 1  | 1  | 1        | 1  | 1  | 1  | 1  | 1    | 1  | 1  | 1  | 1  | 1  |
| 5  | KIAA0319L | 1       | 0  | 0  | 1  | 1        | 0  | 0  | 1  | 1  | 1    | 0  | 0  | 1  | 1  | 0  |
| 6  | KLHL4     | 1       | 1  | 1  | 1  | 1        | 1  | 1  | 1  | 1  | 1    | 1  | 1  | 1  | 1  | 1  |
| 7  | MED12     | 1       | 1  | 1  | 1  | 1        | 1  | 1  | 1  | 1  | 1    | 1  | 1  | 1  | 1  | 1  |
| 8  | PILRB     | 1       | 1  | 1  | 1  | 1        | 1  | 1  | 1  | 1  | 1    | 1  | 1  | 1  | 1  | 1  |
| 9  | RBPJ      | 1       | 0  | 0  | 0  | 1        | 0  | 0  | 0  | 0  | 1    | 0  | 0  | 0  | 0  | 0  |
| 10 | SIK1      | 1       | 1  | 1  | 1  | 1        | 1  | 1  | 1  | 1  | 1    | 1  | 1  | 1  | 1  | 1  |
| 11 | U2AF1     | 1       | 1  | 0  | 1  | 1        | 1  | 0  | 1  | 1  | 1    | 1  | 0  | 1  | 1  | 0  |

## References

- [1] Lee, J., et al. (2015) A Bayesian feature allocation model for tumor heterogeneity. *The Annals of Applied Statistics*, **9**, 621–639.

Table 4: CLL006: Proportions of Subclones.

|          |    | TP a | TP b | TP c | TP d | TP e |
|----------|----|------|------|------|------|------|
| Clomial  | C0 | 0.00 | 0.00 | 0.00 | 0.00 | 0.00 |
|          | C1 | 0.03 | 0.09 | 0.03 | 0.13 | 0.12 |
|          | C2 | 0.36 | 0.31 | 0.36 | 0.22 | 0.13 |
|          | C3 | 0.32 | 0.09 | 0.30 | 0.06 | 0.09 |
|          | C4 | 0.30 | 0.52 | 0.31 | 0.58 | 0.66 |
| BayClone | C0 | 0.00 | 0.01 | 0.01 | 0.00 | 0.00 |
|          | C1 | 0.01 | 0.09 | 0.02 | 0.12 | 0.14 |
|          | C2 | 0.33 | 0.32 | 0.33 | 0.23 | 0.15 |
|          | C3 | 0.30 | 0.08 | 0.29 | 0.07 | 0.09 |
|          | C4 | 0.13 | 0.06 | 0.10 | 0.14 | 0.06 |
|          | C5 | 0.23 | 0.44 | 0.25 | 0.44 | 0.56 |
| Cloe     | C0 | 0.00 | 0.00 | 0.00 | 0.00 | 0.00 |
|          | C1 | 0.01 | 0.07 | 0.03 | 0.14 | 0.14 |
|          | C2 | 0.34 | 0.39 | 0.35 | 0.24 | 0.15 |
|          | C3 | 0.23 | 0.04 | 0.22 | 0.03 | 0.06 |
|          | C4 | 0.12 | 0.04 | 0.08 | 0.17 | 0.05 |
|          | C5 | 0.25 | 0.45 | 0.25 | 0.40 | 0.54 |
|          | C6 | 0.05 | 0.01 | 0.07 | 0.02 | 0.06 |

Table 5: CLL003: Genotypes of Subclones.

|    | Gene    | Clomial |    |    |    | BayClone |    | Cloe |    |    |    |
|----|---------|---------|----|----|----|----------|----|------|----|----|----|
|    |         | C1      | C2 | C3 | C4 | C1       | C2 | C1   | C2 | C3 | C4 |
| 1  | ADAD1   | 1       | 1  | 1  | 1  | 1        | 1  | 1    | 1  | 1  | 1  |
| 2  | AMTN    | 0       | 1  | 0  | 1  | 0        | 1  | 0    | 1  | 0  | 0  |
| 3  | APBB2   | 0       | 1  | 0  | 1  | 0        | 1  | 0    | 1  | 0  | 0  |
| 4  | ASXL1   | 1       | 0  | 0  | 1  | 1        | 0  | 1    | 0  | 0  | 1  |
| 5  | ATM     | 0       | 1  | 1  | 1  | 0        | 1  | 0    | 1  | 0  | 0  |
| 6  | BPIL2   | 0       | 1  | 0  | 1  | 0        | 1  | 0    | 1  | 0  | 0  |
| 7  | CHRNA2  | 1       | 0  | 0  | 0  | 1        | 0  | 1    | 0  | 0  | 0  |
| 8  | CHTF8   | 1       | 1  | 1  | 1  | 1        | 1  | 1    | 1  | 1  | 1  |
| 9  | FAT3    | 1       | 0  | 0  | 0  | 1        | 0  | 1    | 0  | 0  | 0  |
| 10 | HERC2   | 1       | 1  | 1  | 1  | 1        | 1  | 1    | 1  | 1  | 1  |
| 11 | IL11RA  | 1       | 1  | 0  | 1  | 1        | 1  | 1    | 1  | 1  | 0  |
| 12 | MTUS1   | 0       | 1  | 0  | 1  | 0        | 1  | 0    | 1  | 0  | 0  |
| 13 | MUSK    | 1       | 0  | 0  | 1  | 1        | 0  | 1    | 0  | 0  | 1  |
| 14 | NPY     | 1       | 0  | 0  | 0  | 1        | 0  | 1    | 0  | 0  | 0  |
| 15 | NRG3    | 1       | 0  | 0  | 0  | 1        | 0  | 1    | 0  | 0  | 0  |
| 16 | PLEKHG5 | 0       | 1  | 0  | 1  | 0        | 1  | 0    | 1  | 0  | 0  |
| 17 | SEMA3E  | 1       | 0  | 0  | 1  | 1        | 0  | 1    | 0  | 0  | 1  |
| 18 | SF3B1   | 1       | 1  | 1  | 1  | 1        | 1  | 1    | 1  | 1  | 1  |
| 19 | SHROOM1 | 1       | 1  | 1  | 1  | 1        | 1  | 1    | 1  | 1  | 1  |
| 20 | SPTAN1  | 0       | 1  | 0  | 1  | 0        | 1  | 0    | 1  | 0  | 0  |

Table 6: CLL003: Proportions of Subclones.

|          |    | TP a | TP b | TP c | TP d | TP e |
|----------|----|------|------|------|------|------|
| Clomial  | C0 | 0.00 | 0.00 | 0.35 | 0.09 | 0.03 |
|          | C1 | 0.00 | 0.01 | 0.46 | 0.91 | 0.96 |
|          | C2 | 0.72 | 0.84 | 0.01 | 0.00 | 0.00 |
|          | C3 | 0.18 | 0.08 | 0.06 | 0.00 | 0.00 |
|          | C4 | 0.10 | 0.07 | 0.12 | 0.01 | 0.01 |
| BayClone | C0 | 0.00 | 0.01 | 0.33 | 0.01 | 0.02 |
|          | C1 | 0.06 | 0.03 | 0.45 | 0.96 | 0.96 |
|          | C2 | 0.94 | 0.96 | 0.13 | 0.03 | 0.02 |
| Cloe     | C0 | 0.08 | 0.00 | 0.34 | 0.06 | 0.01 |
|          | C1 | 0.01 | 0.00 | 0.45 | 0.94 | 0.98 |
|          | C2 | 0.77 | 0.85 | 0.10 | 0.00 | 0.00 |
|          | C3 | 0.00 | 0.09 | 0.00 | 0.00 | 0.01 |
|          | C4 | 0.14 | 0.06 | 0.11 | 0.00 | 0.00 |
